# Supplementary material for: Equine PBMC Cytokines Profile after In Vitro α- and γ-EHV Infection: Efficacy of a Parapoxvirus Ovis Based-Immunomodulator Treatment
Source: Vaccines (Basel). 2017 Sep 19;5(3):28. doi: 10.3390/vaccines5030028 (PMC5620559; doi:10.3390/vaccines5030028)
Supplement: Supplementary file 1 [file vaccines-05-00028-s001.pdf]

Article

# Equine PBMC cytokines profile after *in vitro* $\alpha$ - and $\gamma$ -EHV infection: efficacy of a Parapoxvirus ovis based-immunomodulator treatment.

Erika S. Hue<sup>1,\*</sup>, Eric A. Richard<sup>2</sup>, Christine I. Fortier<sup>3</sup>, Guillaume D. Fortier<sup>4</sup>, Romain Paillot<sup>5</sup>, Rudiger Raue<sup>6</sup> and Stéphane L. Pronost<sup>7</sup>

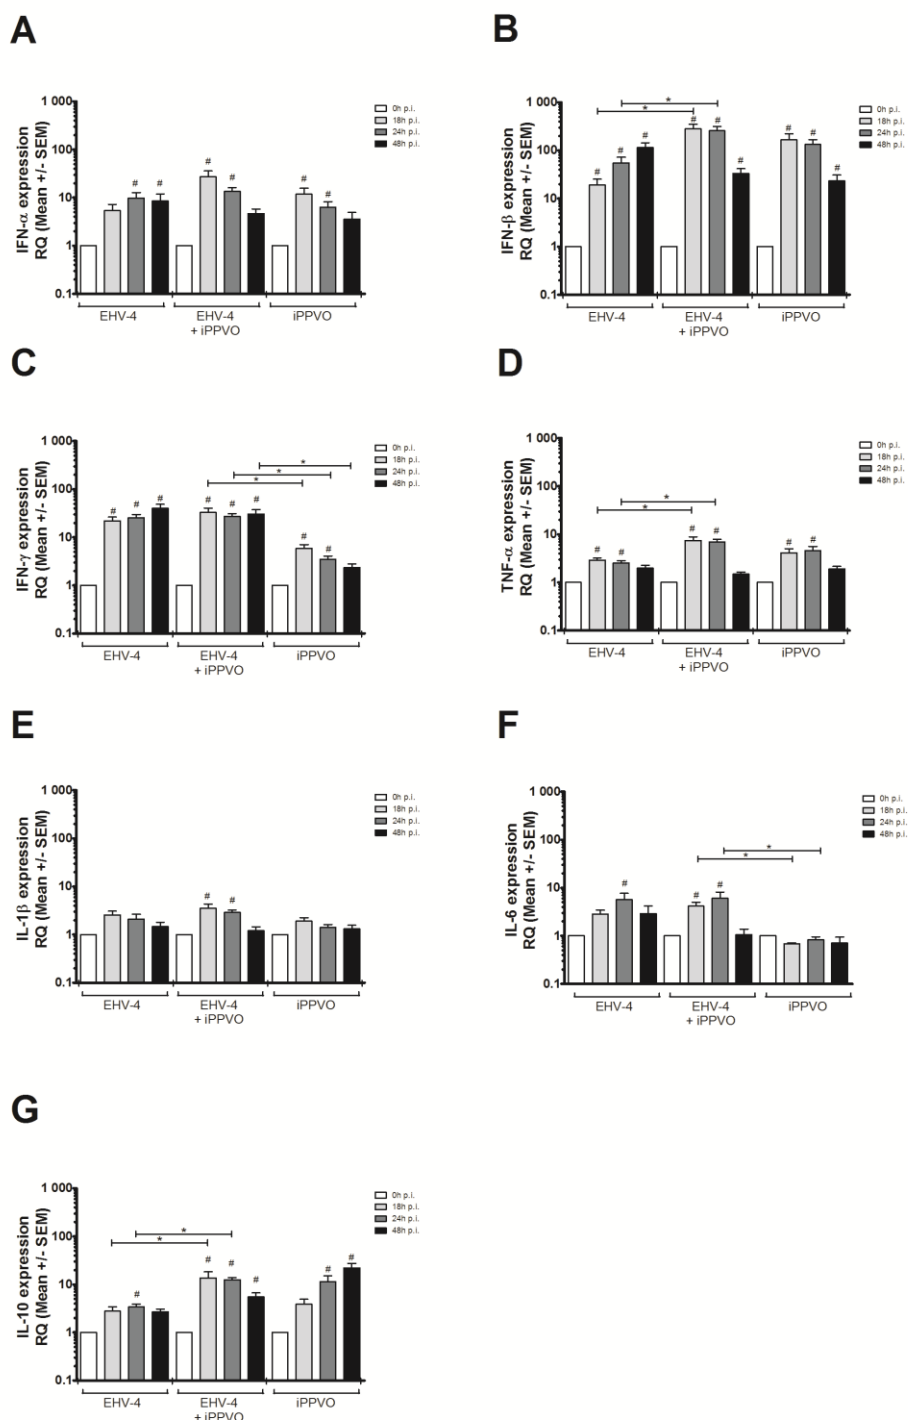

**Figure S1.** Cytokines mRNA expression measured by real-time PCR after infection of PBMC with EHV-4 alone, after co-treatment iPPVO/EHV-4 and after iPPVO treatment. Cytokines measured were IFN- $\alpha$  (A), IFN- $\beta$  (B), IFN- $\gamma$  (C), TNF- $\alpha$  (D), IL-1 $\beta$  (E), IL-6 (F) and IL-10 (G). White bars represent mRNA expression at 0 h (T<sub>0</sub>), light grey bars represented mRNA expression at 18 hpi, dark grey bars at 24 hpi and black bars at 48 hpi; n=3 horses with 3 independent reverse-transcriptase PCR. Data are reported as means  $\pm$  SEM as times-fold increase over the T<sub>0</sub>. The level of significance was setup at p-value <0.05. Significant differences compared to T<sub>0</sub> are indicating by # and differences between all conditions by star (p<0.05). The iPPVO/EHV co-infection condition was compared with EHV infection alone or iPPVO treatment alone.

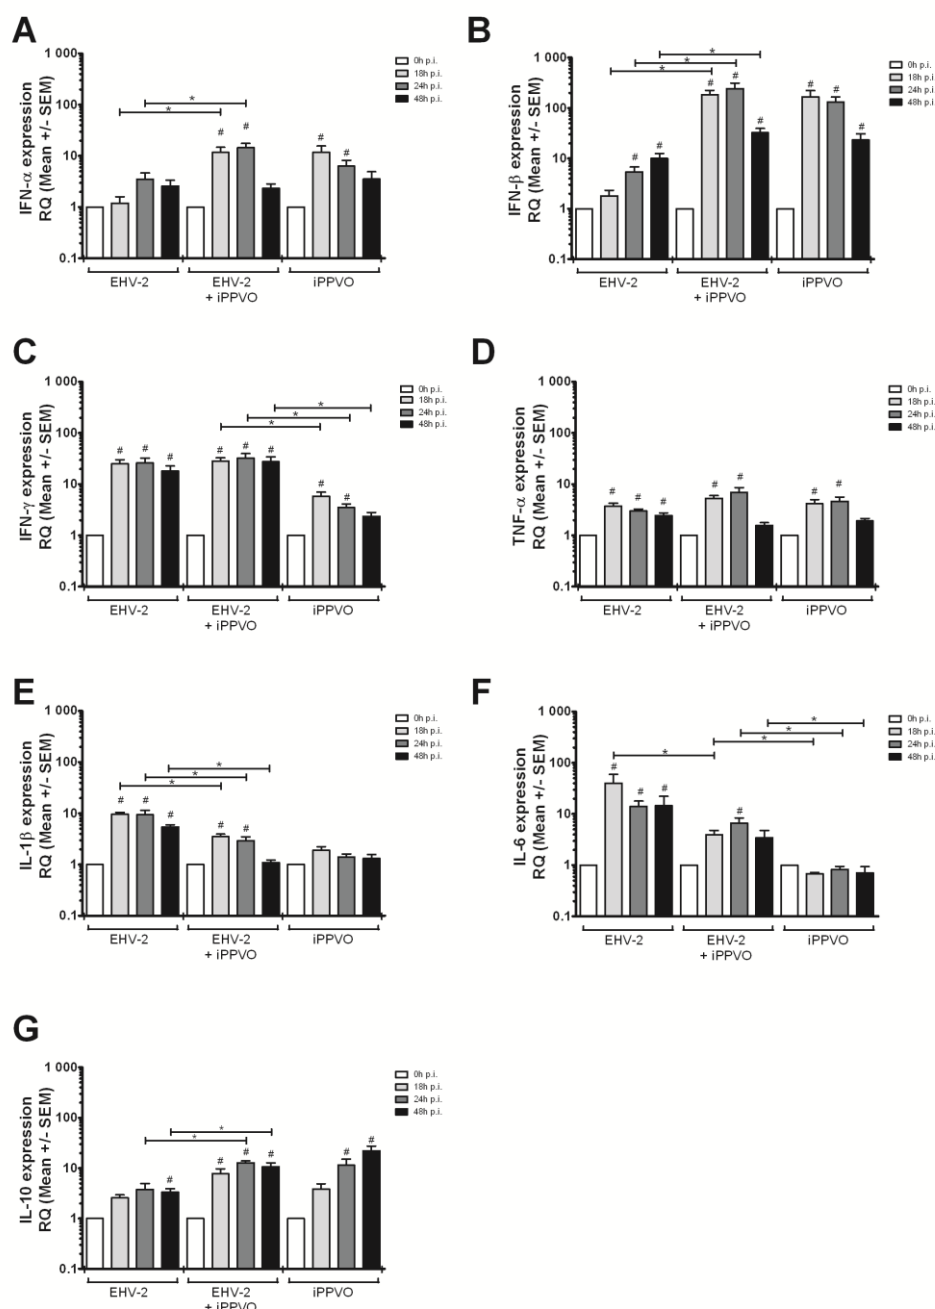

**Figure S2.** Cytokines mRNA expression measured by real-time PCR after infection of PBMC with EHV-2 alone, after co-treatment iPPVO/EHV-2 and after iPPVO treatment. Cytokines measured were IFN- $\alpha$  (A), IFN- $\beta$  (B), IFN- $\gamma$  (C), TNF- $\alpha$  (D), IL-1 $\beta$  (E), IL-6 (F) and IL-10 (G). White bars represent mRNA expression at 0 h (T<sub>0</sub>), light grey bars represented mRNA expression at 18 hpi, dark grey bars at 24 hpi and black bars at 48 hpi; n=3 horses with 3 independent reverse-transcriptase PCR. Data are

reported as means  $\pm$  SEM as times-fold increase over the T<sub>0</sub>. The level of significance was setup at p-value <0.05. Significant differences compared to T<sub>0</sub> are indicating by # and differences between all conditions by star (p<0.05). The iPPVO/EHV co-infection condition was compared with EHV infection alone or iPPVO treatment alone.

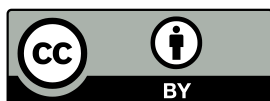

© 2017 by the authors. Licensee MDPI, Basel, Switzerland. This article is an open access article distributed under the terms and conditions of the Creative Commons Attribution (CC BY) license (<http://creativecommons.org/licenses/by/4.0/>).
